# Supplementary material
Source: PubMed Central journal article supplement (PMC7087128)
Supplement: 705_2018_3967_MOESM1_ESM.pdf [file 705_2018_3967_MOESM1_ESM.pdf]

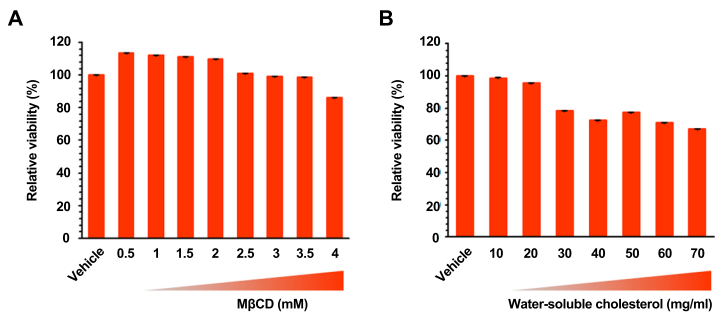

**Supplementary Fig. 1.** ST cells were incubated with various concentrations of M $\beta$ CD (A) or water-soluble cholesterol (B) for 24 h prior to the MTT assay, and the cytotoxic effects of M $\beta$ CD and cholesterol were determined by the MTT assay.

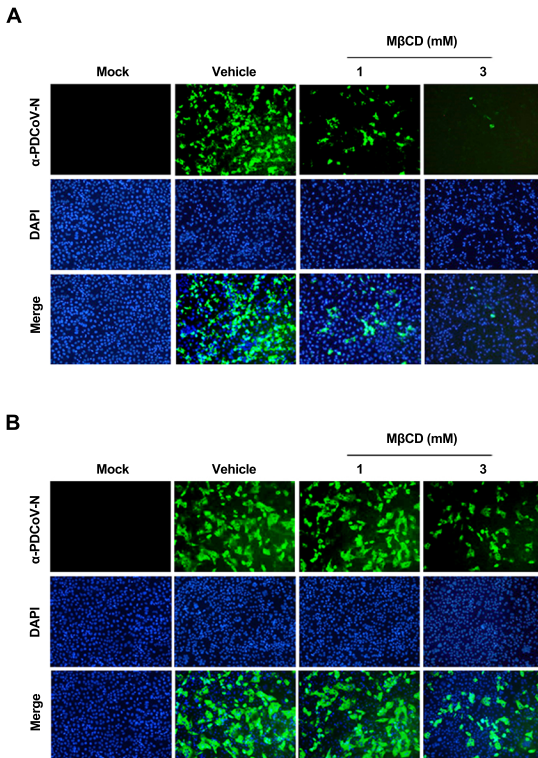

**Supplementary Fig. 2.** Effects of cellular (A) or viral (B) cholesterol depletion on the replication of PDCoV. (A) ST cells were preincubated with M $\beta$ CD at the indicated concentrations for 1 h prior to infection and were mock infected or infected with PDCoV at an MOI of 1. Virus-infected cells were further maintained in the presence of vehicle or M $\beta$ CD. (B) PDCoV was treated with M $\beta$ CD at the indicated concentrations for 1 h and ultracentrifuged. The purified viral suspensions were used to infect ST cells, and the virus-infected cells were subjected to IFA. For immunostaining, infected cells were fixed at 12 hpi and incubated with MAb against the PDCoV N protein, followed by incubation with Alexa-green-conjugated goat anti-mouse secondary antibody. The cells were then counterstained with DAPI and examined using a fluorescent microscope at 200 $\times$  magnification.

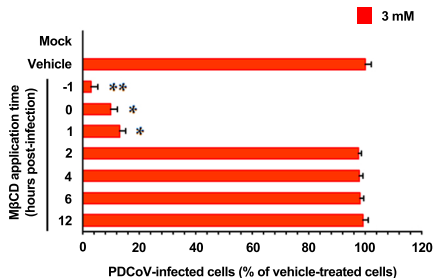

**Supplementary Fig. 3.** Effects of cellular cholesterol sequestration on virus propagation at early time points post-infection. ST cells were pretreated with M $\beta$ CD and were mock-infected or infected with PDCoV. At 24 hpi, the virus-infected cells were fixed, and viral infectivity was determined by measuring the percentage of cells expressing PDCoV N proteins using FACS analysis. The data are presented as the mean values of three independent experiments, and error bars represent standard deviations. \*,  $P = 0.001-0.05$ ; \*\*,  $P < 0.001$ .
